# Supplementary material for: Raw milk and fecal microbiota of commercial Alpine dairy cows varies with herd, fat content and diet
Source: PubMed Central journal article supplement (PMC7410245; doi:10.1371/journal.pone.0237262), 2020-08-06
Supplement: pone.0237262.s001.pdf [file pone.0237262.s001.pdf]

Milk

Call:

```
adonis(formula = d ~ heard.ID, data = v, permutations = 9999)
```

Permutation: free

Number of permutations: 9999

Terms added sequentially (first to last)

|           | Df | SumsOfSqs | MeanSqs  | F.Model | R2      | Pr(>F)    |
|-----------|----|-----------|----------|---------|---------|-----------|
| heard.ID  | 9  | 1.1255    | 0.125060 | 3.293   | 0.35864 | 1e-04 *** |
| Residuals | 53 | 2.0128    | 0.037978 |         | 0.64136 |           |
| Total     | 62 | 3.1384    |          |         | 1.00000 |           |
