# Supplementary material for: Raw milk and fecal microbiota of commercial Alpine dairy cows varies with herd, fat content and diet
Source: PubMed Central journal article supplement (PMC7410245; doi:10.1371/journal.pone.0237262), 2020-08-06
Supplement: pone.0237262.s008.pdf [file pone.0237262.s008.pdf]

Faeces

Call:

```
adonis(formula = d ~ heard.ID, data = v, permutations = 9999)
```

Permutation: free

Number of permutations: 9999

Terms added sequentially (first to last)

|           | Df | SumsOfSqs | MeanSqs  | F.Model | R2      | Pr(>F)    |
|-----------|----|-----------|----------|---------|---------|-----------|
| heard.ID  | 9  | 0.63508   | 0.070564 | 6.9418  | 0.41245 | 1e-04 *** |
| Residuals | 89 | 0.90469   | 0.010165 |         | 0.58755 |           |
| Total     | 98 | 1.53976   |          |         | 1.00000 |           |
