# Supplementary material for: Raw milk and fecal microbiota of commercial Alpine dairy cows varies with herd, fat content and diet
Source: PLoS One. 2020 Aug 6;15(8):e0237262. doi: 10.1371/journal.pone.0237262 (PMC7410245; doi:10.1371/journal.pone.0237262)
Supplement: S2 Table — (XLSX) [file pone.0237262.s002.xlsx]

## Sheet: Fecal samples
Phylum	Median	Q1	Q3	Mean	SD
Firmicutes	0.512216	0.481973	0.539973	0.511209	0.042457
Bacteroidetes	0.383892	0.348405	0.414946	0.381209	0.052029
Unclassified	0.032919	0.026649	0.040730	0.031209	0.011545
Proteobacteria	0.026054	0.015676	0.040622	0.021209	0.027944
Spirochaetes	0.013027	0.007135	0.017973	0.011209	0.008643
Candidatus Saccharibacteria	0.007946	0.005919	0.009946	0.001209	0.003966
Verrucomicrobia	0.005243	0.001135	0.012243	0.001209	0.009516
Tenericutes	0.002324	0.001459	0.003757	0.001209	0.004201
Actinobacteria	0.001405	0.000730	0.004243	0.001209	0.003419
Planctomycetes	0.000270	0.000054	0.000703	0.001209	0.000461
Elusimicrobia	0.000108	0.000000	0.000297	0.001209	0.000235
Lentisphaerae	0.000108	0.000000	0.000432	0.001209	0.000782
Chloroflexi	0.000000	0.000000	0.000000	0.001209	0.000048
Cyanobacteria/Chloroplast	0.000000	0.000000	0.000054	0.001209	0.000073
Fibrobacteres	0.000000	0.000000	0.001135	0.001209	0.001273
Fusobacteria	0.000000	0.000000	0.000000	0.001209	0.000017
Synergistetes	0.000000	0.000000	0.000000	0.001209	0.000014
